# Supplementary material for: IL-15 mediated expansion of rare durable memory T cells following adoptive cellular therapy
Source: PubMed Central journal article supplement — J Immunother Cancer. 2021 May 7;9(5):e002232. doi: 10.1136/jitc-2020-002232 (PMC8108691; doi:10.1136/jitc-2020-002232), 2021-05-07
Supplement: jitc-2020-002232supp001.pdf [file jitc-2020-002232supp001.pdf]

## Suppl Fig 1: Patient eligibility (pg 1 of 2)

### 5.1 Inclusion Criteria

**5.1.1** Histopathological documentation of the diagnosis of synovial sarcoma and myxoid liposarcoma with metastatic or unresectable disease who have received an alkylating agent containing regimen (such as doxorubicin plus Ifosphamide).

This includes patients who received an alkylating agent as part of adjuvant therapy and then relapsed. Patients who were treated on the PICCASSO trial who have progressed will be allowed on the study.

“Unresectable disease” shall include patients with locally advanced disease where a surgery could be attempted but where this surgery would be mutilating, debilitating and would likely fail to result in long-term disease free survival. In this setting a patient might reasonably choose to undergo salvage/second line systemic therapy but could also pursue aggressive surgical options as standard of care.

**5.1.2** Male or female subject, 18 or older and able to tolerate high-dose cyclophosphamide

**5.1.3** NY-ESO-1 expression in >25% of tumor by IHC (at least 2+)

**5.1.4** Expression of HLA-A0201. High resolution HLA typing performed at any experienced HLA lab will be accepted.

**5.1.5** Zubrod performance status of ‘0-1’ (Appendix B)

**5.1.6** Patients with metastatic disease must have bi-dimensionally measurable disease by palpation on clinical exam, or radiographic imaging (CT scan). Please see section 9.3.1 regarding exceptions for patients with bi-dimensionally measurable but radiated locally advanced disease.

**5.1.7** All patients must have an ECG. Patients with well-controlled diabetes who have an absolutely normal ECG, no cardiac history and with a performance status 0 require no further work up. Patients with history of cardiac disease, or with ongoing cardiac type chest pain must have a normal stress test within 182 days prior to treatment. Patients with diabetes who have any degree of shortness of breath or an abnormal ECG must undergo stress testing within 182 days prior to treatment.

**5.1.8** Patients must have already been leukapheresed on either protocol 1246 or 2365 prior to entry into this study. Patients who are unable to have a leukapheresis product collected, for whatever reason, will be unable to participate in this study.

**5.1.9** If there is a patient with an NY-ESO-1 expressing sarcoma who would be otherwise eligible for the trial, where there has been disagreement between pathologists regarding the histopathologic diagnosis, eligibility will be decided on by the PI.

**5.1.10** Patients must have had NY-ESO-1 specific cells already in production. Patients must have NY-ESO-1 specific cells that have been generated and sorted. These cells may be either in the process of expansion or expanded and frozen at the time of enrollment.

**5.1.11** Patients with definitively treated brain metastasis and patients with 4 or fewer untreated lesions less than 1 cm each will be included at the discretion of the PI.

**5.1.12 Patients must be off metformin at least 2 weeks before receiving T cell therapy**

**5.2.13 Patients must have hemoglobin A1C < 8.5%**

## Suppl Fig 1: Patient eligibility (pg 2 of 2)

### 5.2 Exclusion Criteria

- 5.2.1** Patients for whom we are unable to generate NY-ESO-1 specific cells
- 5.2.2** Pregnant women, nursing mothers, men or women of reproductive ability who are unwilling to use effective contraception or abstinence. Women of childbearing potential must have a negative pregnancy test within two weeks prior to entry.
- 5.2.3** Serum creatinine > 1.5 mg/dL or Glomerular Filtration Rate >50.
- 5.2.4** Significant hepatic dysfunction (SGOT > 150 IU or > 3x upper limit of normal; bilirubin > 1.6 mg/dL; prothrombin time > 1.5 x control)
- 5.2.5** Most patients with metastatic sarcoma will have pulmonary metastasis and it is expected that the majority will have some mild to moderate baseline shortness of breath. These patients will be allowed on study so long as their ECOG performance status is 1. Patients with severe pulmonary dysfunction ( $\geq$  Grade 3 Respiratory disorders as defined by CTCAE v4) will not be allowed on study until their condition improves. However, patients who have recently experienced a decrease in their pulmonary function will be required to undergo pulmonary function testing. Patients with a FEV1 < 1.5L or DLco (corr for Hgb) <50% will be excluded. Patients with a reversible cause of pulmonary dysfunction may undergo repeat testing and enroll if their PFT's meet criterion.
- 5.2.6** Significant cardiovascular abnormalities as defined by any one of the following:  
active, symptomatic congestive heart failure  
clinically significant hypotension  
symptoms of coronary artery disease  
presence of cardiac arrhythmias on EKG requiring drug therapy which has not been stable for at least 6 months
- 5.2.7** All patients must have an echo showing EF > 50% and normal troponin and CK MB.
- 5.2.8** Patients with symptomatic untreated brain metastasis or asymptomatic untreated brain metastasis > 1cm will not be allowed to participate. Additionally, patients with five or more untreated brain metastasis under 1 cm will not be allowed to participate. Treatment may include surgery or stereotactic radiation at the discretion of the patient's treatment team. Patients must be off steroids when starting therapy.
- 5.2.9** Patients with active infections or oral temperature > 38.2 C within 72 hours of study entry or systemic infection requiring chronic maintenance or suppressive therapy
- 5.2.10** Chemotherapeutic agents (standard or experimental or other immunosuppressive therapies) less than 3 weeks prior to T cell therapy (patients with bulky disease may undergo cytoreductive chemotherapy but treatment will be discontinued at least 3 weeks prior to T cell infusion). Patients may receive palliative radiation therapy two weeks prior to T cell infusion.
- 5.2.11** Clinically significant autoimmune disorders or conditions of immunosuppression. Patients with AIDS or HIV-1 associated complex or known to be HIV antibody seropositive or known to be recently PCR+ for hepatitis are not eligible for this study. Virology testing will be done within 6 months of T cell infusion. The severely depressed immune system found in these infected patients and the possibility of premature death would compromise study objectives.
- 5.2.12** Current treatment with steroids
- 5.2.13** Patients must not be receiving any other experimental drugs within 3 weeks of the initiation of treatment and must have recovered from all side effects of such therapy.
- 5.2.14** Patients who were not negative for HBV, HCV at the time of their leukapheresis on 1246 or 2365 must be retested to be sure they are PCR negative.

Supplementary Table 1

| Antibody/Reagent  | Fluorophore | Clone       | Vendor         | Concentration |
|-------------------|-------------|-------------|----------------|---------------|
| CD8a              | Pe Dazzle   | RPA-T8      | Biologend      | 50ug/mL       |
| CD27              | BUV737      | M-T271      | BD Bioscience  | 0.2 mg/mL     |
| CD39              | APC Cy7     | A1          | Biologend      | 100 ug/mL     |
| CD45RA            | BV605       | HI 100      | Biologend      | 25 ug/mL      |
| CD103             | PECy7       | BER ACT8    | Biologend      | 100 ug/mL     |
| CCR7              | AF700       | G043H7      | Biologend      | 400 ug/mL     |
| TIM-3             | BV650       | F38 2E2     | Biologend      | 100 ug/mL     |
| PD1               | BV786       | EH12.1      | BD Horizon     | NA            |
| SLAMF6            | PE          | NT-7        | Biologend      | 100 ug/mL     |
| Ki67              | BV711       | Ki67        | Biologend      | 100 ug/mL     |
| TCF-1             | AF488       | Rabbit mAB  | Cell Signaling | 100 ug/mL     |
| TNF $\alpha$      | PerCPCY5.5  | MAB11       | Biologend      | 60 ug/mL      |
| IFN $\gamma$      | BV510       | B27         | Biologend      | 100 ug/mL     |
| Granzyme B        | Pac Blue    | GB11        | Biologend      | 100 ug/mL     |
| DCM               | efluor405   | NA          | Invitrogen     | NA            |
| NY-ESO-1 Tetramer | APC         | SLL MWI TOC | Fred Hutch     | 0.4 mg/ml     |

Supplementary Table 2

| Cytokines | Vendor             | Concentration                               |
|-----------|--------------------|---------------------------------------------|
| IL-2      | Peprtech           | Low dose: 10 U/mL<br>High Dose: 1000 U/mL   |
| IL-15     | Peprtech           | Low dose: 10 ng/mL<br>High Dose: 1000 ng/mL |
| Anti-PD-1 | Biologend EH12.2H7 | 10 ug/mL                                    |

**Detailed methodology regarding 3D Culture:** GFP transduced 1765 MRCL cells were embedded in 2.5 mg/ml Collagen Type I (Corning) at a concentration of  $2 \times 10^2$  cells/ $\mu$ l in a solution with pH of ~ 7.5. 10 $\mu$ l of the above mix was injected into organoid chips (AIM Biotech) into each of the 4 injection ports.<sup>14</sup> Chips were then kept at 37° C for at-least 1h. Retronectin was injected into the lining ports and 1h later the lining ports were washed with PBS.  $1.5 \times 10^4$  mCherry transduced HUVEC cells were then injected into the each of the 4 lining ports. Chips were then kept at 37° C for at-least 1h.  $1 \times 10^4$  T cells each were injected into 2 lining ports. EBM media (Lonza) conditioned with cytokines was used to perfuse the chips. Chips were perfused by gravity flow as additional media was added into one-side(left) of the chips. Organoid chips were imaged using the Leica SP8 microscope. 49 Z stacks with 3 $\mu$ m step size were acquired with a 10X objective. GFP+ cells were identified and counted using Imaris software.

## Suppl. Table 3 : Adverse Event (AE) tables (pg 1 of 3)

| Body System                                                 | Initials | Body system                                          | Adverse Event                   | Dur | Grade Onset | Grade Highest | Frequency    | Expected | CTL       | IFN- gamma | Cytoxan  | IL-2 |
|-------------------------------------------------------------|----------|------------------------------------------------------|---------------------------------|-----|-------------|---------------|--------------|----------|-----------|------------|----------|------|
| <b>Blood and lymphatic system disorders</b>                 | Cy1      | Blood and lymphatic system disorders                 | Platelet count decreased        | 27  | 1           | 1             | Intermittent | No       | Unlikely  | NA         | Probable | NA   |
|                                                             | Cy1      | Blood and lymphatic system disorders                 | Anemia                          |     | 1           |               | Intermittent | No       | Unlikely  | NA         | Probable | NA   |
|                                                             | Cy2      | Blood and lymphatic system disorders                 | Anemia                          | 42  | 1           | 1             | Intermittent | Yes      | Unlikely  | NA         | Unlikely | NA   |
|                                                             | Cy3      | Blood and lymphatic system disorders                 | Anemia                          |     | 1           | 1             | Intermittent |          | Unlikely  | NA         | Probable | NA   |
|                                                             | Cy4      | Blood and lymphatic system disorders                 | Anemia                          |     | 1           |               | Intermittent | Yes      | Unlikely  | NA         | Probable | NA   |
| <b>Cardiac disorders</b>                                    | Cy1      | Cardiac disorders                                    | Pre-existing prolonged QRS      |     |             |               | Continuous   | NA       | NA        | NA         | NA       | NA   |
| <b>GI disorders</b>                                         | Cy3      | Gastrointestinal disorders                           | Nausea                          | 11  | 1           | 1             | Intermittent | Yes      | Unlikely  | NA         | Probable | NA   |
|                                                             | Cy4      | Gastrointestinal disorders                           | Nausea                          | 3   | 1           | 2             | Intermittent | Yes      | Unlikely  | NA         | Probable | NA   |
|                                                             | Cy4      | Gastrointestinal disorders                           | Vomiting                        | 3   | 1           | 1             | Intermittent | Yes      | Unlikely  | NA         | Probable | NA   |
|                                                             | Cy4      | Gastrointestinal disorders                           | Nausea                          | 21  | 1           | 1             | Intermittent | Yes      | Unlikely  | NA         | Probable | NA   |
|                                                             | Cy4      | Gastrointestinal disorders                           | Vomiting                        | 18  | 1           | 1             | Intermittent | Yes      | Unrelated | NA         | Probable | NA   |
|                                                             | Cy4      | Gastrointestinal disorders                           | Gastroesophageal reflux disease |     | 1           |               |              | Yes      | Unrelated | NA         | Possible | NA   |
|                                                             |          |                                                      |                                 |     |             |               |              |          |           |            |          |      |
| <b>General disorders and administration site conditions</b> | Cy2      | General disorders and administration site conditions | Fatigue                         |     | 1           | 1             | Intermittent | No       | Unlikely  |            | Unlikely |      |
|                                                             | Cy3      | General disorders and administration site conditions | Fatigue                         | 13  | 1           | 1             | Intermittent | Yes      | Unlikely  |            | Probable |      |
|                                                             | Cy4      | General disorders and administration site conditions | Fever                           | 1   | 1           | 1             | Continuous   | Yes      | Possible  | NA         | Probable | NA   |
|                                                             | Cy4      | General disorders and administration site conditions | Fatigue                         | 59  | 1           | 1             | Intermittent | Yes      | Unlikely  | NA         | Probable | NA   |
|                                                             | Cy4      | General disorders and administration site conditions | Chills                          | 1   | 1           | 1             | Continuous   | Yes      | Possible  | NA         | Probable | NA   |
|                                                             | Cy4      | General disorders and administration site conditions | Fever                           | 0   | 1           | 1             | Continuous   | Yes      | Possible  | NA         | Probable | NA   |
|                                                             | Cy4      | General disorders and administration site conditions | Fatigue                         | 10  | 1           | 1             | Intermittent | Yes      | Unlikely  | NA         | Probable | NA   |
| <b>Investigations</b>                                       | Cy1      | Investigations                                       | Lymphocyte count decreased      |     | 1           | 4             | Intermittent | Yes      | Unlikely  | NA         | Probable | NA   |
|                                                             | Cy1      | Investigations                                       | Neutrophil count decreased      | 8   | 2           | 2             | Intermittent | No       | Unlikely  | NA         | Probable | NA   |
|                                                             | Cy2      | Investigations                                       | Neutrophil count decreased      | 21  | 1           | 1             | Intermittent | Yes      | Unlikely  | NA         | Probable | NA   |
|                                                             | Cy1      | Investigations                                       | Alkaline phosphatase increased  | 0   | 1           | 1             | Continuous   | No       | Unlikely  | NA         | Possible | NA   |
|                                                             | Cy2      | Investigations                                       | Lymphocyte count decreased      |     | 1           | 3             | Intermittent | Yes      | Unlikely  | NA         | Probable | NA   |
|                                                             |          |                                                      |                                 |     |             |               |              |          |           |            |          |      |

Suppl. Table 3 : AE tables (pg 2 of 3)

| Body System                                            | Initials | Body system                                     | Adverse Event                        | Dur | Grade Onset | Grade Highest | Frequency    | Expected | CTL       | IFN- gamma | Cytoxan   | IL-2 |
|--------------------------------------------------------|----------|-------------------------------------------------|--------------------------------------|-----|-------------|---------------|--------------|----------|-----------|------------|-----------|------|
|                                                        | Cy2      | Investigations                                  | Alkaline phosphatase increased       | 14  | 1           | 1             | Intermittent | No       | Unlikely  | NA         | Unlikely  | NA   |
|                                                        | Cy2      | Investigations                                  | Platelet count decreased             | 11  | 1           | 1             | Intermittent | No       | Unlikely  | NA         | Unlikely  | NA   |
|                                                        | Cy3      | Investigations                                  | Lymphocyte count decreased           |     | 1           | 3             | Intermittent | Yes      | Unlikely  | NA         | Probable  | NA   |
|                                                        | Cy3      | Investigations                                  | Aspartate aminotransferase increased | 21  | 3           | 3             | Intermittent | Yes      | Unlikely  | NA         | Probable  | NA   |
|                                                        | Cy3      | Investigations                                  | Alkaline phosphatase increased       | 21  | 1           | 1             | Intermittent | Yes      | Unlikely  | NA         | Probable  | NA   |
|                                                        | Cy3      | Investigations                                  | Creatinine increased                 | 1   | 1           | 1             | Once         | No       | Unlikely  | NA         | Unlikely  | NA   |
|                                                        | Cy3      | Investigations                                  | Platelet count decreased             | 18  | 1           | 3+19          | Intermittent | Yes      | Unlikely  | NA         | Probable  | NA   |
|                                                        | Cy4      | Investigations                                  | Creatinine increased                 | 130 | 1           | 1             | Intermittent | Yes      | Unlikely  | NA         | Possible  | NA   |
|                                                        | Cy4      | Investigations                                  | White blood cell decreased           | 138 | 1           | 4             | Intermittent | Yes      | Unlikely  | NA         | Probable  | NA   |
|                                                        | Cy4      | Investigations                                  | Platelet count decreased             | 109 | 1           | 4             | Intermittent | Yes      | Unlikely  | NA         | Probable  | NA   |
|                                                        | Cy4      | Investigations                                  | Lymphocyte count decreased           |     | 2           | 4             | Intermittent | Yes      | Unlikely  | NA         | Probable  | NA   |
|                                                        | Cy4      | Investigations                                  | Blood bilirubin increased            |     | 1           |               | Intermittent | No       | Unlikely  | NA         | Possible  | NA   |
|                                                        | Cy4      | Investigations                                  | Neutrophil count decreased           | 90  | 2           | 2             | Intermittent | Yes      | Unlikely  | NA         | Probable  | NA   |
| <b>Metabolism and nutrition disorders</b>              |          |                                                 |                                      |     |             |               |              |          |           |            |           |      |
|                                                        | Cy1      | Metabolism and nutrition disorders              | Hypoalbuminemia                      | 7   | 2           | 2             | Intermittent | No       | Unrelated | NA         | Unrelated | NA   |
|                                                        | Cy1      | Metabolism and nutrition disorders              | Hypocalcemia                         | 28  | 2           | 2             | Intermittent | No       | Unrelated | NA         | Possible  | NA   |
|                                                        | Cy1      | Metabolism and nutrition disorders              | Hyponatremia                         | 10  | 2           | 2             | Intermittent | No       | Unlikely  | NA         | Probable  | NA   |
|                                                        | Cy2      | Metabolism and nutrition disorders              | Hyponatremia                         | 6   | 1           | 1             | Intermittent | No       | Unlikely  | NA         | Unlikely  | NA   |
|                                                        | Cy1      | Metabolism and nutrition disorders              | Hypokalemia                          | 9   | 3           | 3             | Intermittent | No       | Unlikely  | NA         | Possible  | NA   |
|                                                        | Cy2      | Metabolism and nutrition disorders              | Hypocalcemia                         | 18  | 1           | 1             | Intermittent | No       | Unlikely  | NA         | Unlikely  | NA   |
|                                                        | Cy3      | Metabolism and nutrition disorders              | Hypocalcemia                         | 2   | 1           | 1             | Intermittent | No       | Unlikely  | NA         | Unlikely  | NA   |
|                                                        | Cy3      | Metabolism and nutrition disorders              | Hypermagnesemia                      | 1   | 1           | 1             | Intermittent | No       | Unlikely  | NA         | Unlikely  | NA   |
|                                                        | Cy3      | Metabolism and nutrition disorders              | Hypoalbuminemia                      | 2   | 1           | 1             | Intermittent | No       | Unlikely  | NA         | Unlikely  | NA   |
|                                                        | Cy3      | Metabolism and nutrition disorders              | Hyponatremia                         | 1   | 1           | 1             | Intermittent | No       | Unlikely  | NA         | Unlikely  | NA   |
|                                                        | Cy4      | Metabolism and nutrition disorders              | Hypocalcemia                         | 90  | 1           | 1             | Intermittent | Yes      | Unlikely  | NA         | Possible  | NA   |
|                                                        | Cy4      | Metabolism and nutrition disorders              | Hypoalbuminemia                      | 89  | 2           | 2             | Intermittent | No       | Unrelated | NA         | Unrelated | NA   |
|                                                        | Cy4      | Metabolism and nutrition disorders              | Hypermagnesemia                      |     | 1           |               | Intermittent | No       | Unlikely  | NA         | Possible  | NA   |
|                                                        | Cy4      | Metabolism and nutrition disorders              | Hyponatremia                         | 90  | 1           | 1             | Intermittent | Yes      | Unlikely  | Na         | Possible  | NA   |
|                                                        | Cy4      | Metabolism and nutrition disorders              | Hypophosphatemia                     | 75  | 1           | 1             | Intermittent | No       | Unrelated | NA         | Unrelated | NA   |
|                                                        | Cy4      | Metabolism and nutrition disorders              | Hypokalemia                          | 88  | 1           | 1             | Intermittent | No       | Unlikely  | NA         | Probable  | NA   |
| <b>Musculoskeletal and connective tissue disorders</b> |          |                                                 |                                      |     |             |               |              |          |           |            |           |      |
|                                                        | Cy1      | Musculoskeletal and connective tissue disorders | Back pain                            | 3   | 1           | 1             | Intermittent | No       | Unlikely  | NA         | Unlikely  | NA   |
|                                                        | Cy2      | Musculoskeletal and connective tissue disorders | Bone pain                            |     | 2           | 2             | Intermittent | No       | Unlikely  | NA         | Unlikely  | NA   |
|                                                        | Cy4      | Musculoskeletal and connective tissue disorders | Pain in extremity                    |     | 1           |               | Intermittent | No       | Unrelated | NA         | Unrelated | NA   |
| <b>Nervous system disorders</b>                        |          |                                                 |                                      |     |             |               |              |          |           |            |           |      |
|                                                        | Cy1      | Nervous system disorders                        | Peripheral motor neuropathy          |     | 1           | 1             | Continuous   | NA       | NA        | NA         | NA        | NA   |
|                                                        | Cy2      | Nervous system disorders                        | Dizziness                            | 1   | 1           | 1             | Once         | No       | Unlikely  | NA         | Unlikely  | NA   |
|                                                        | Cy3      | Nervous system disorders                        | Headache                             | 1   | 1           | 1             | Intermittent | No       | Unlikely  | NA         | Unlikely  | NA   |

## Suppl. Table 3: AE tables (pg 3 of 3)

| Body System                                            | Initials | Body system                                     | Adverse Event    | Dur | Grade Onset | Grade Highest | Frequency    | Expected | CTL       | IFN- gamma | Cytoxan   | IL-2 |
|--------------------------------------------------------|----------|-------------------------------------------------|------------------|-----|-------------|---------------|--------------|----------|-----------|------------|-----------|------|
|                                                        | Cy4      | Nervous system disorders                        | Headache         | 1   | 1           | 1             | Continuous   | Yes      | Unlikely  | Possible   |           | NA   |
| <b>Psychiatric disorders</b>                           | Cy1      | Psychiatric disorders                           | Anxiety          |     | 2           |               | Intermittent | No       | Unrelated | NA         | Unrelated | NA   |
|                                                        | Cy3      | Psychiatric disorders                           | Restlessness     | 1   | 1           | 1             | Intermittent | No       | Unlikely  | NA         | Unlikely  | NA   |
|                                                        | Cy4      | Psychiatric disorders                           | Anxiety          |     | 1           |               | Intermittent | No       | NA        | NA         | NA        | NA   |
| <b>Renal and urinary disorders</b>                     | Cy4      | Renal and urinary disorders                     | Hematuria        | 8   | 1           | 1             | Intermittent | Yes      | Unlikely  | NA         | Probable  | NA   |
|                                                        | Cy4      | Renal and urinary disorders                     | Proteinuria      |     | 1           |               | Once         | Yes      | Unlikely  | NA         | Probable  | NA   |
| <b>Respiratory, thoracic and mediastinal disorders</b> | Cy1      | Respiratory, thoracic and mediastinal disorders | Sore throat      | 1   | 1           |               | Continuous   | No       | Unlikely  | NA         | Possible  | NA   |
|                                                        | Cy2      | Respiratory, thoracic and mediastinal disorders | Dyspnea          |     | 1           | 1             | Intermittent | No       | Unlikely  | NA         | Unlikely  | NA   |
|                                                        | Cy4      | Respiratory, thoracic and mediastinal disorders | Nasal congestion | 0   | 1           | 1             | Once         | No       | Unlikely  | NA         | Possible  | NA   |

## Supplemental Fig 2: Additional Clinical Summary

### Cy1

Cy1 was originally diagnosed with a myxoid/round cell liposarcoma of the thigh that was treated with resection and adjuvant radiation. He then had distant spine recurrence nearly 10 years later, treated again with resection and radiation. One year later he developed multifocal recurrence in the lung treated with AIM, and later single agent ifosfamide after developing cardiotoxicity with good response to chemotherapy. He was then treated on study with conditioning and cell infusion. Residual lung disease was resected 4 months after cell infusion. There was recurrence in the lung one year after cell infusion. Chemotherapy was reinitiated. His disease eventually continued to progress.

### Cy2

Cy2 presented with gross hematuria and was found to have renal synovial sarcoma with bilateral lung metastasis at diagnosis. He was treated with upfront resection of the renal mass followed by AIM for 6 cycles and then a treatment break. He had progression with disease in his abdomen about 6 months later and was treated on protocol with cell therapy. The rate of progression seemed to slow but there was PD by RECIST 2-3 months after receiving cell infusion. He subsequently received several different regimens and palliative radiation.

### Cy3

Cy3 was initially diagnosed with a synovial sarcoma of the distal lower extremity treated with a neoadjuvant ifosfamide, epirubicin, and sorafenib on a clinical trial with radiation. About 6 months after completion of chemotherapy, he had bilateral lung recurrence with rapid growth and he was treated with NY-ESO-1 specific T cells following HD Cy conditioning. He progressed 3 months later and started subsequent chemotherapy with trabectedin, pazopanib, and AIM for further progression before eventually developing brain metastasis.

### Cy4

CY4 received neoadjuvant MAID, and then resection of 2 local recurrences. He was treated with gemcitabine+Docetaxel, sorafenib, capecitabine, erlotinib, and pazopanib over the years preceding enrolling on this study. He was treated with T-cells after developing widespread metastatic disease, received radiotherapy to a lesion in the pelvis, and then underwent conditioning and received a second infusion of cells 2 months after the first T-cell therapy. He received palliative radiation and eventually went on hospice care the following year.



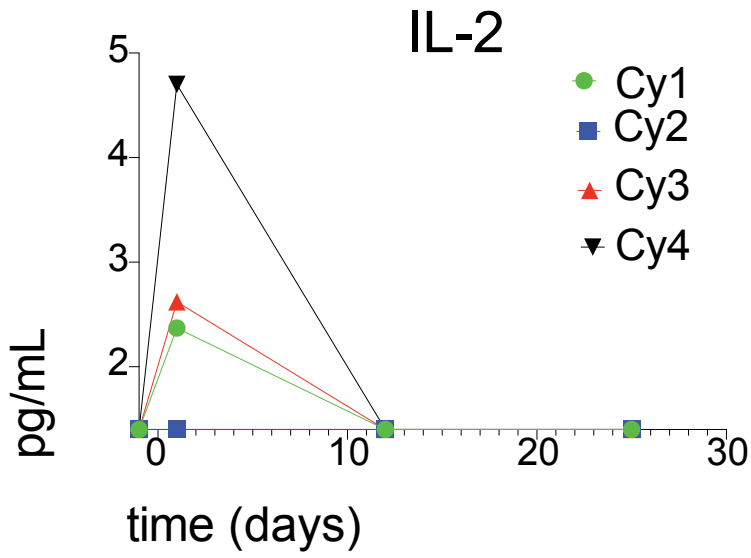

**Suppl. Fig. 3. Serum IL-2 concentrations**

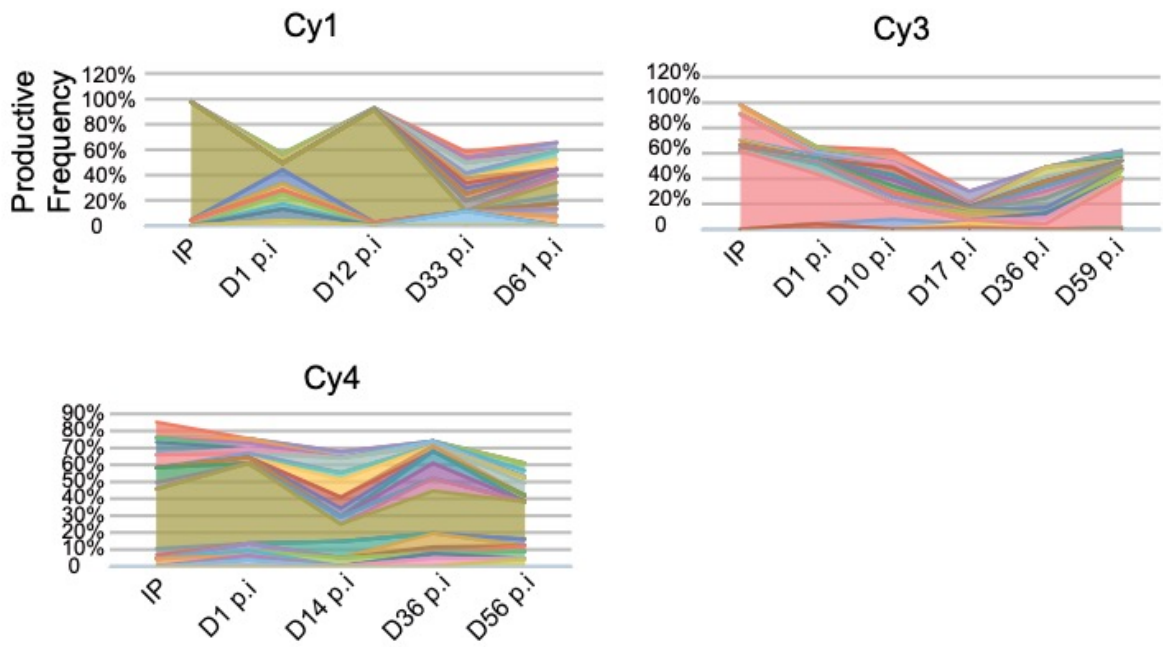

**Suppl. Fig. 4. Persistence of dominant clones vary in patients.** Sequencing of TCR $\beta$  chain depicting different T cell clones (each clone represented by a different color) prior to infusion and at various times post infusion for patient Cy1, Cy3 and Cy4.

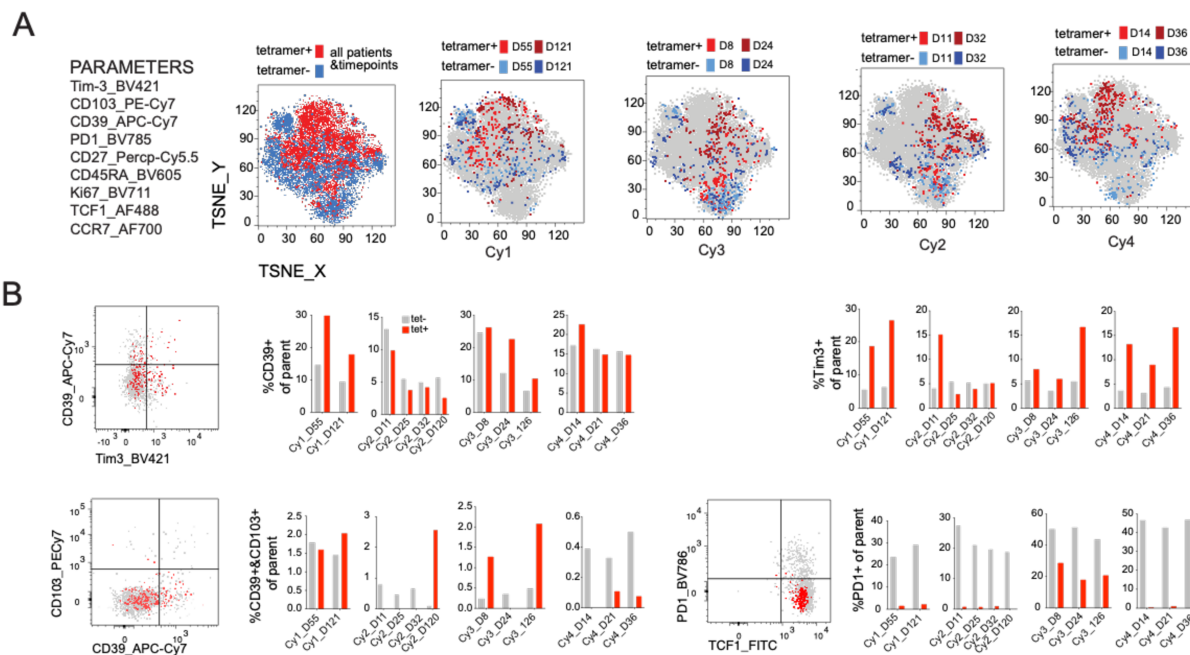

**Suppl. Fig. 5. Phenotype of NY-ESO-1 specific T cells in patients' PBMCs.** A) Representative t-SNE analysis of CD8<sup>+</sup> cells from 4 patients. t-SNE cluster (grey) is generated from pooled CD8<sup>+</sup> T cells from all patients and various time points post infusion. (Cy1:d55, d121; Cy2:d11, d25, d32, d120; Cy3:d8, d126; Cy4: d21, d28, d36, d49). t-SNE was run based on indicated parameters. Tet<sup>+</sup> positive cells from each patient are overlaid on pooled cluster in shades of red and tetramer<sup>-</sup> cells are overlaid in shades of blue. B) Representative plot for expression of CD39, CD103, Tim3, PD1 in tet<sup>+</sup> (red) and tet<sup>-</sup> (grey) cells. C) Frequency of CD39<sup>+</sup>, Tim3<sup>+</sup>, CD39&CD103<sup>+</sup> and PD1<sup>+</sup> cells of tet<sup>+</sup> (red bars) and tet<sup>-</sup> (grey bars).

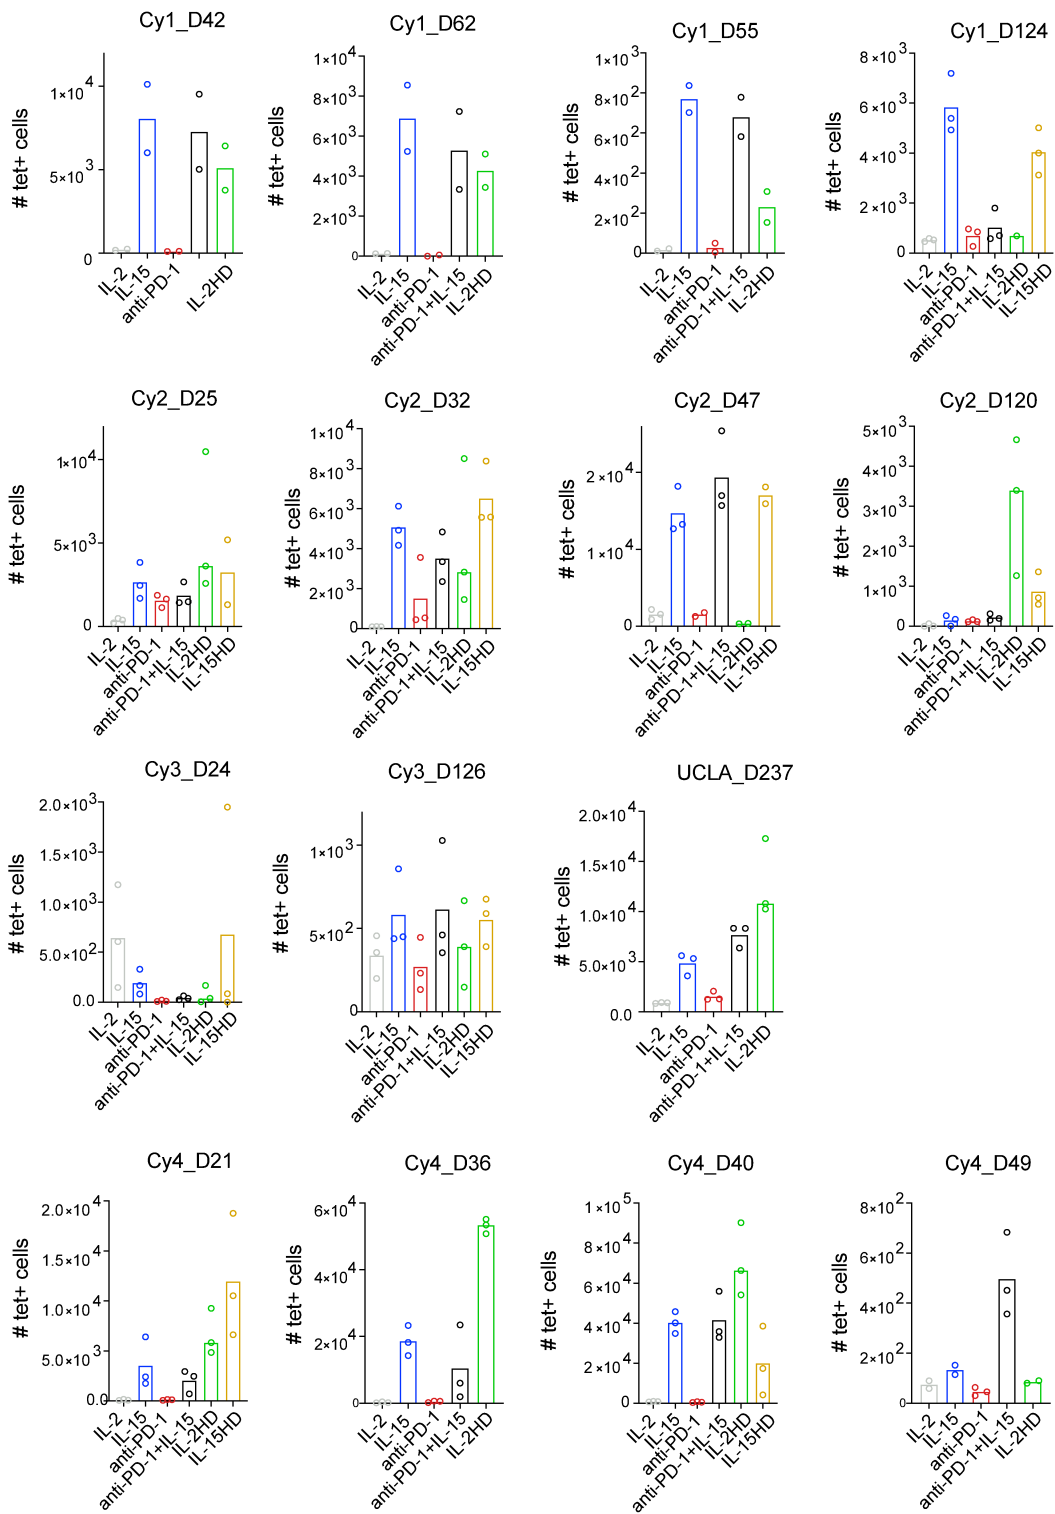

**Suppl. Fig. 6. IL-15 and high dose IL-2 expand NY-ESO1-1 specific T cells.** 9-day culture of patients' PBMCs with NY-ESO-1 peptide in conditioned media. Bars show number of tetramer+ cells in cultures supplemented with IL-2 (grey), IL-2+IL-15 (blue), IL-2+anti-PD-1 (red), IL-2+IL-15+anti-PD-1 (black) and high dose IL-2 (green) and high dose IL-15 (orange). Each dot represents one technical replicate

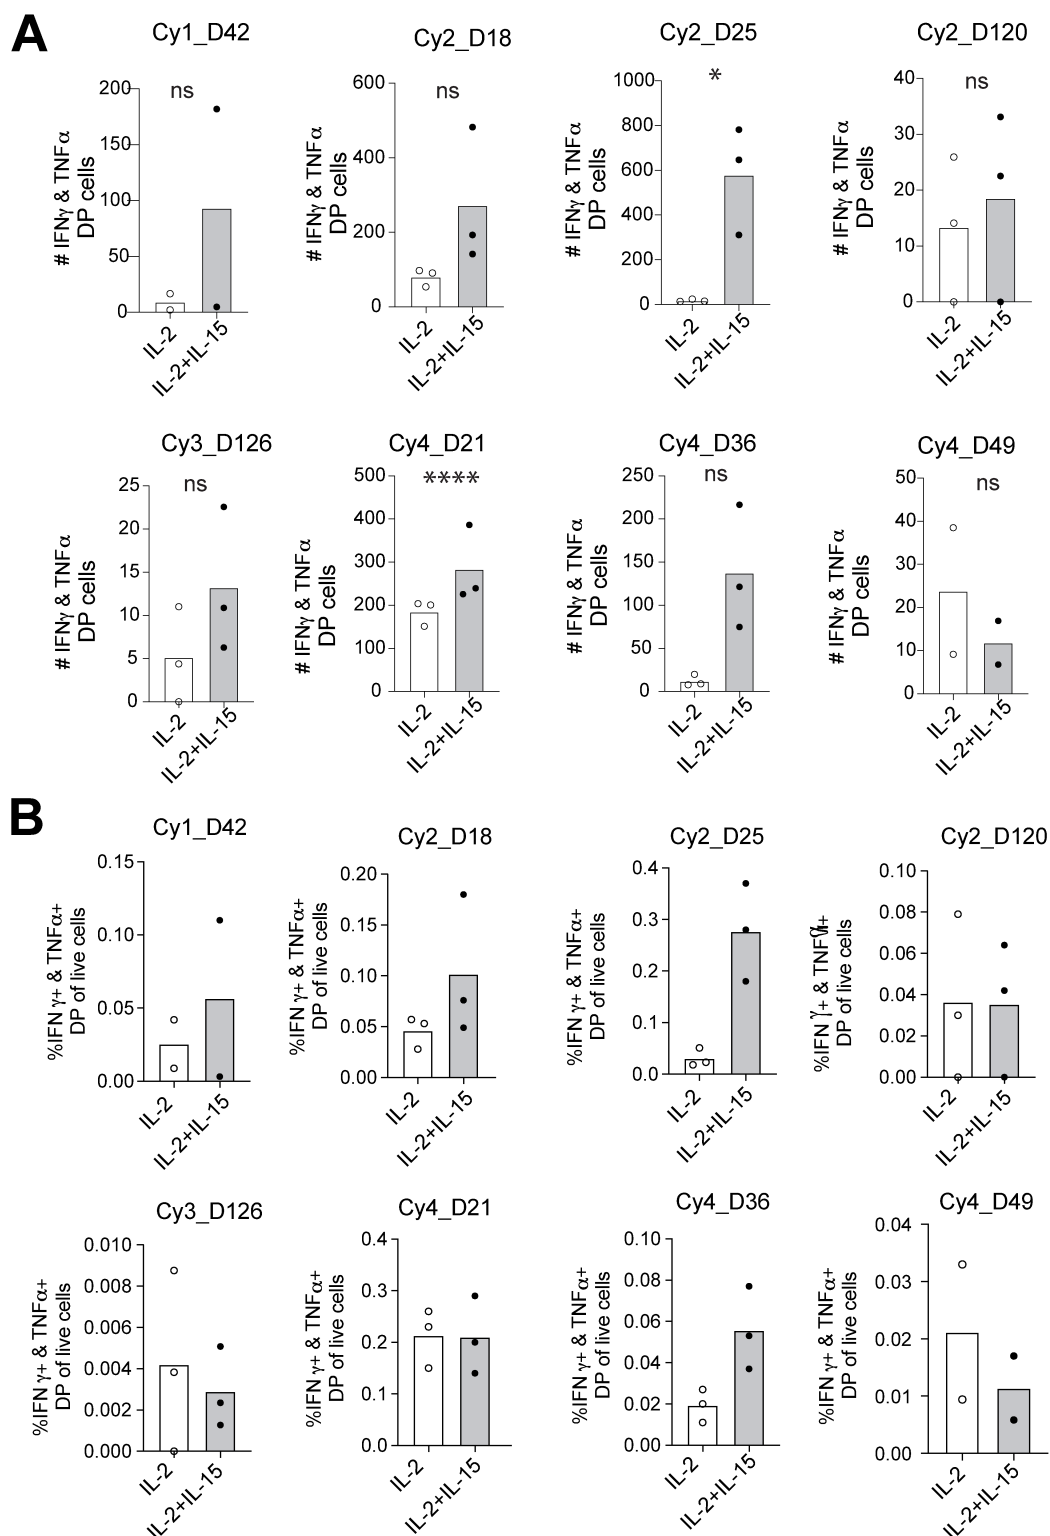

Suppl. Fig. 7. IL-15 increases the number of IFN $\gamma$  and TNF $\alpha$  producing cells. A) Number of IFN $\gamma$  and TNF $\alpha$  double positive (DP) tet $^+$  cells and B) Percentage of IFN $\gamma$  and TNF $\alpha$  DP tet $^+$  cells of all live cells in patients' PBMC 9-day culture supplemented with IL-2 (clear bars with clear dots) or IL-2 plus IL-15 (grey bars with black dots). Each dot represents one technical replicate. \*\*\*\* p < 0.0001, \* p < 0.05.

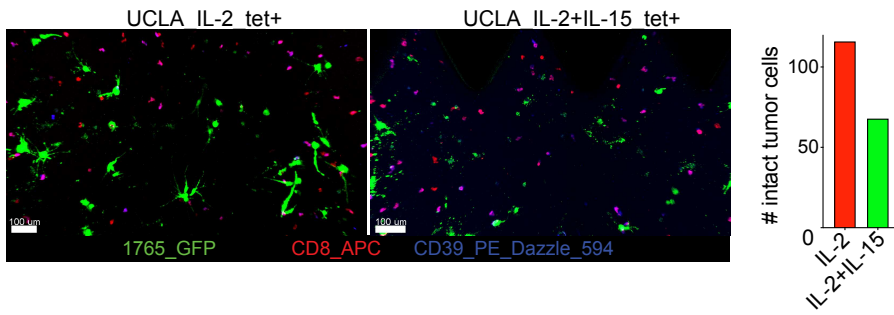

**Suppl. Fig. 8: IL-15 increases cytotoxicity of NY-ESO-1 specific T cells.** PBMCs of patient from UCLA trial cultured with NY-ESO-1 peptide and supplemented with IL-2 or IL-2 plus IL-15 for 7 days and tet<sup>+</sup> and tet<sup>-</sup> cells were sorted and injected into organoid chips. Number of GFP<sup>+</sup> 1765 cells were counted 48h post T cell injection. Each bar represents one 3D chip. Experiment was performed once
